# Supplementary material for: Organisation of extracellular matrix proteins laminin and agrin in pericapillary basal laminae in mouse brain
Source: PubMed Central journal article supplement (PMC7046580; doi:10.1007/s00429-020-02036-3), 2020-02-18

**A: Agrin**

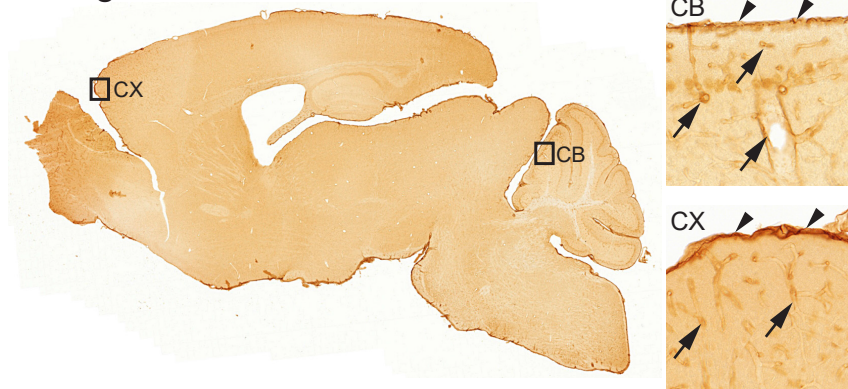

**B: Laminin**

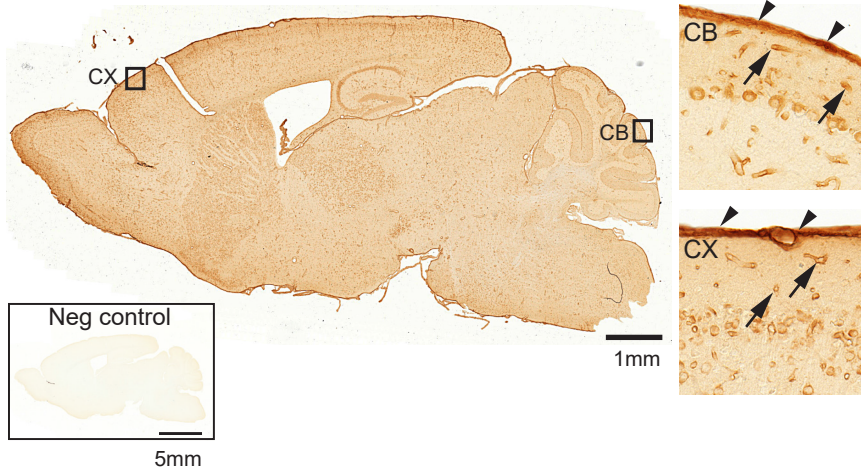

Supplement: 429_2020_2036_MOESM1_ESM.pdf [file 429_2020_2036_MOESM1_ESM.pdf]
