# Supplementary material for: Organisation of extracellular matrix proteins laminin and agrin in pericapillary basal laminae in mouse brain
Source: Springer Nature journal article supplement (doi:10.1007/s00429-020-02036-3), 2020-02-18
Supplement: MOESM2 [file 17719542]

**A****Agrin**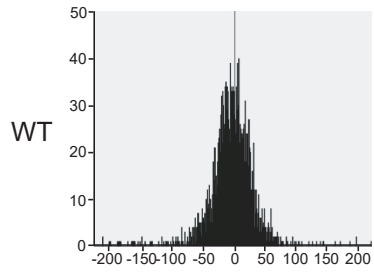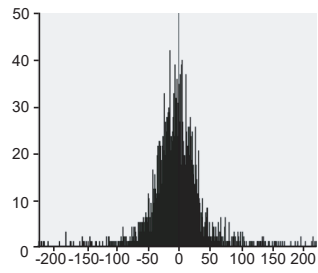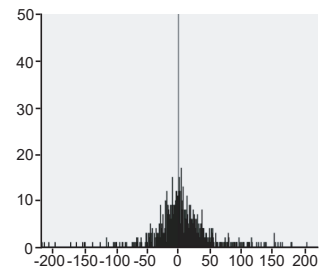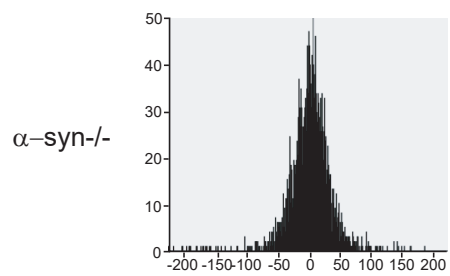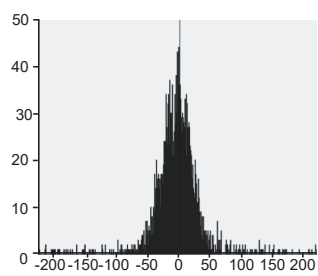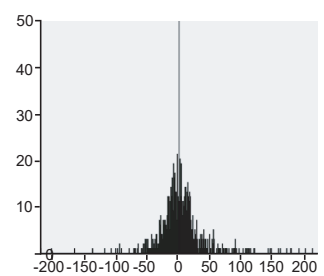

per

end

endper

**B****Laminin**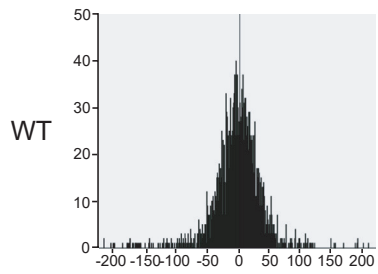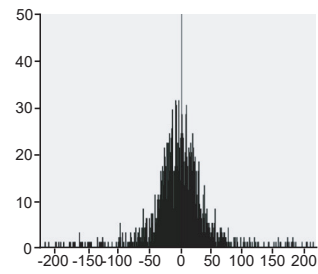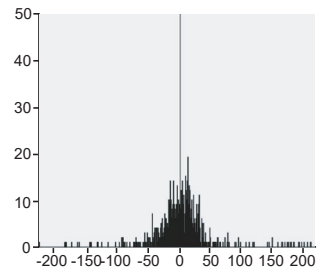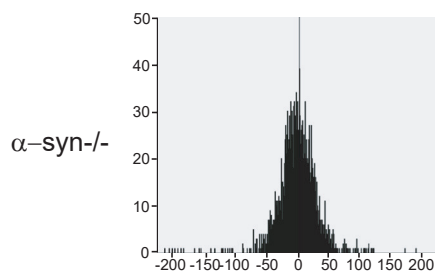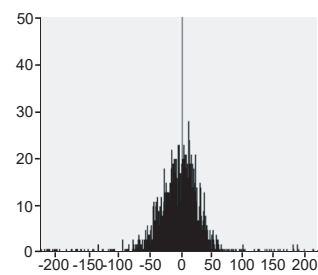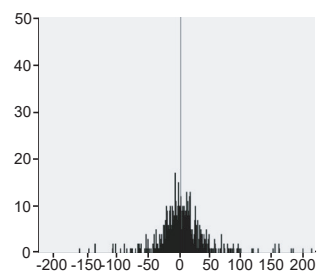

per

end

endper
