# Supplementary material for: Organisation of extracellular matrix proteins laminin and agrin in pericapillary basal laminae in mouse brain
Source: Springer Nature journal article supplement (doi:10.1007/s00429-020-02036-3), 2020-02-18

**A** Agrin

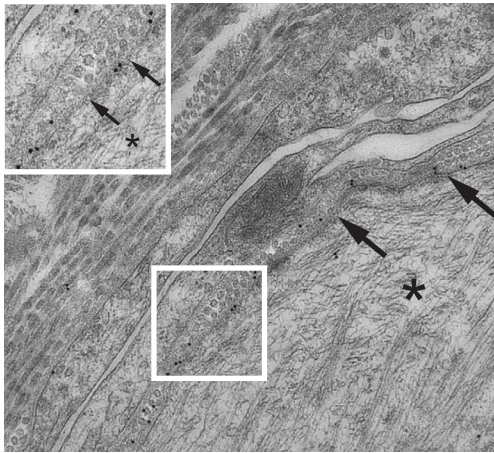

**B** Laminin

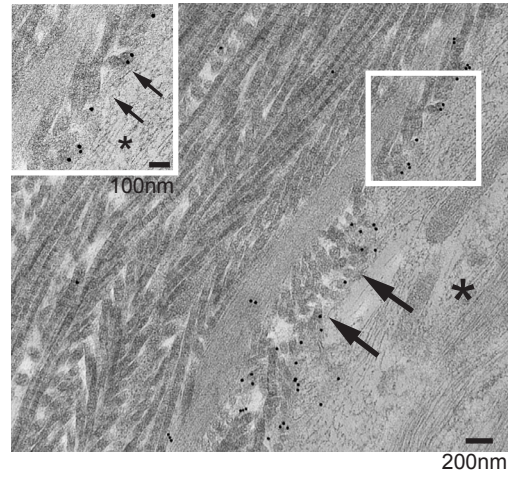

Supplement: MOESM3 [file 17719542]
